# Supplementary material
Source: ML conference proceedings conference paper supplement (https://openaccess.thecvf.com/content/CVPR2021/html/Chen_AQD_Towards_Accurate_CVPR_2021_paper.html)
Supplement: Supplementary file 1 [file Chen_AQD_Towards_Accurate_CVPR_2021_supplemental.pdf]

# Supplementary Materials for AQD: Towards Accurate Quantized Object Detection

Peng Chen<sup>2\*</sup> Jing Liu<sup>1\*</sup> Bohan Zhuang<sup>1†</sup> Mingkui Tan<sup>3</sup> Chunhua Shen<sup>1,2</sup>  
<sup>1</sup>Monash University    <sup>2</sup>University of Adelaide    <sup>3</sup>South China University of Technology

## S1. More Results on ImageNet

**Implementation details.** Following HAQ [8], we quantize all the layers, in which the first and the last layers are quantized to 8-bit. Following [4, 2], we introduce weight normalization during training. We use SGD with nesterov [6] for optimization, with a momentum of 0.9. For all models on ImageNet, we first train the full-precision models and then use the pre-trained weights to initialize the quantized models. We then fine-tune for 150 epochs. The learning rate starts at 0.01 and decays with cosine annealing [5].

**Main Results.** We apply the proposed method to quantize MobileNetV1 [3] and MobileNetV2 [7] to 4-bit. We compare the performance of different methods in Table S1. From the results, our proposed method outperforms other methods by a large margin. For example, compared with HAQ, our proposed method achieve 2.7% and 3.5% higher Top-1 accuracy for 4-bit MobileNetV1 and MobileNetV2.

Table S1 – Performance comparisons on ImageNet.

| Network     | Method         | Top-1 Acc. (%) | Top-5 Acc. (%) |
|-------------|----------------|----------------|----------------|
| MobileNetV1 | Full-precision | 70.9           | 89.8           |
|             | PACT [1]       | 62.4           | 84.2           |
|             | HAQ [8]        | 67.4           | 87.9           |
|             | Ours           | 70.1           | 89.3           |
| MobileNetV2 | Full-precision | 71.9           | 90.3           |
|             | PACT [1]       | 61.4           | 83.7           |
|             | HAQ [8]        | 67.0           | 87.3           |
|             | Ours           | 70.5           | 89.5           |

## References

- [1] Jungwook Choi, Zhuo Wang, Swagath Venkataramani, Pierce I-Jen Chuang, Vijayalakshmi Srinivasan, and Kailash Gopalakrishnan. Pact: Parameterized clipping activation for quantized neural networks. *arXiv preprint arXiv:1805.06085*, 2018. 1
- [2] Steven K. Esser, Jeffrey L. McKinstry, Deepika Bablani, Rathinakumar Appuswamy, and Dharmendra S. Modha. Learned step size quantization. In *Proc. Int. Conf. Learn. Repren.*, 2020. 1
- [3] Andrew G Howard, Menglong Zhu, Bo Chen, Dmitry Kalenichenko, Weijun Wang, Tobias Weyand, Marco Andreetto, and Hartwig Adam. Mobilenets: Efficient convolutional neural networks for mobile vision applications. *arXiv preprint arXiv:1704.04861*, 2017. 1
- [4] Yuhang Li, Xin Dong, and Wei Wang. Additive powers-of-two quantization: An efficient non-uniform discretization for neural networks. In *Proc. Int. Conf. Learn. Repren.*, 2020. 1
- [5] Ilya Loshchilov and Frank Hutter. SGDR: stochastic gradient descent with warm restarts. In *Proc. Int. Conf. Learn. Repren.*, 2017. 1
- [6] Yurii E Nesterov. A method for solving the convex programming problem with convergence rate  $o(1/k^2)$ . In *Proceedings of the USSR Academy of Sciences*, volume 269, pages 543–547, 1983. 1
- [7] Mark Sandler, Andrew Howard, Menglong Zhu, Andrey Zhmoginov, and Liang-Chieh Chen. Mobilenetv2: Inverted residuals and linear bottlenecks. In *Proc. IEEE Conf. Comp. Vis. Patt. Recogn.*, pages 4510–4520, 2018. 1
- [8] Kuan Wang, Zhijian Liu, Yujun Lin, Ji Lin, and Song Han. Haq: Hardware-aware automated quantization with mixed precision. In *CVPR*, 2019. 1

\*First two authors contributed equally.

†Corresponding author. E-mail: bohan.zhuang@monash.edu
